# Supplementary material
Source: ML conference proceedings conference paper supplement (https://openreview.net/forum?id=09WlFpCoc3)

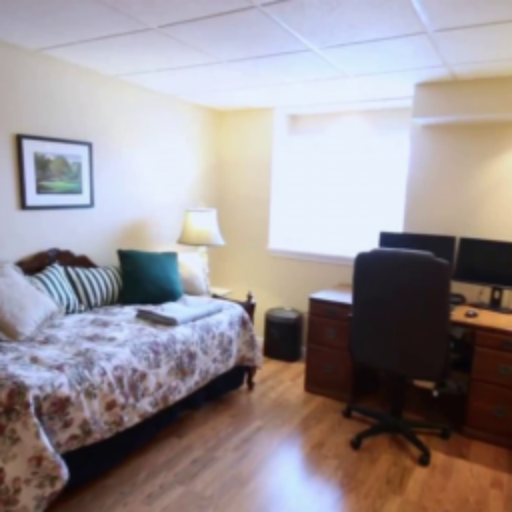

Supplement: supplementary_material [file context01.pdf › CamC2V_Supplementary/sample01/context01.pdf]

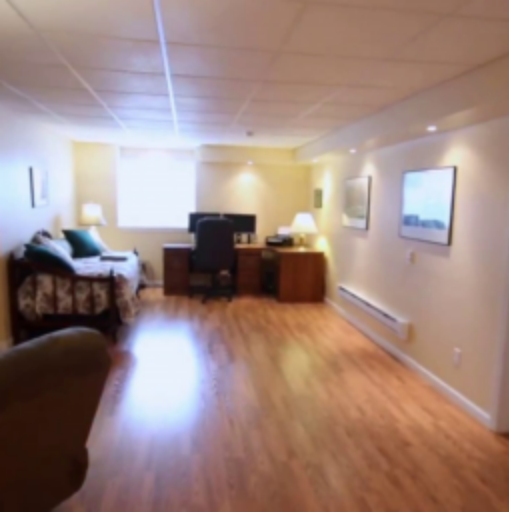

Supplement: supplementary_material [file reference.pdf › CamC2V_Supplementary/sample01/reference.pdf]

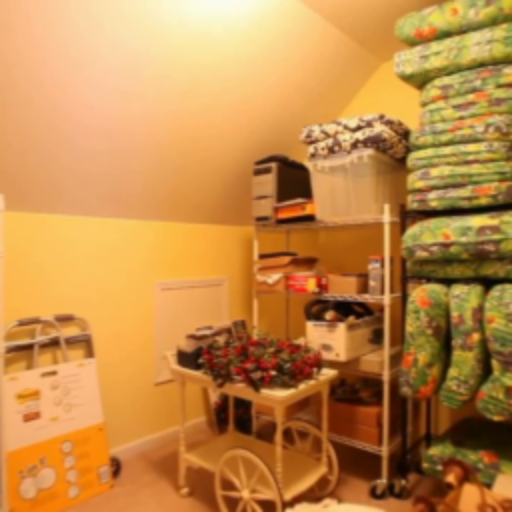

Supplement: supplementary_material [file context01.pdf › CamC2V_Supplementary/sample02/context01.pdf]

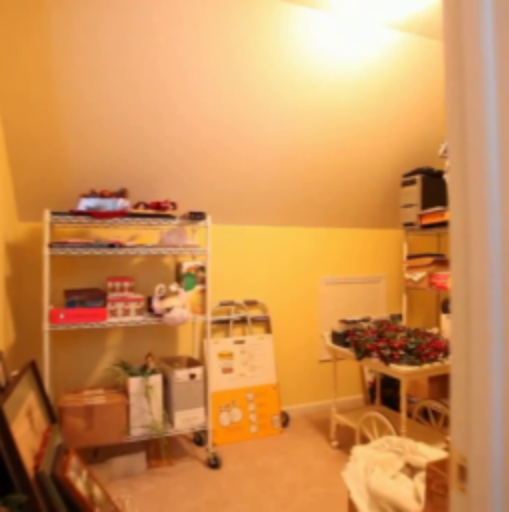

Supplement: supplementary_material [file reference.pdf › CamC2V_Supplementary/sample02/reference.pdf]

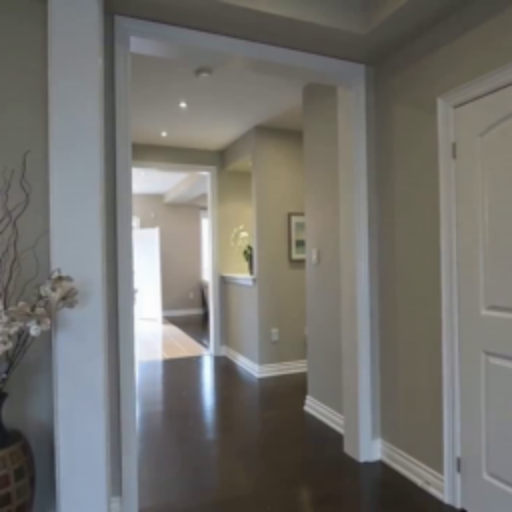

Supplement: supplementary_material [file context01.pdf › CamC2V_Supplementary/sample03/context01.pdf]

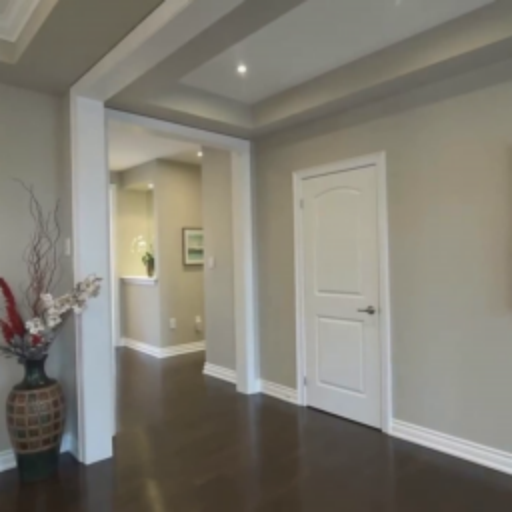

Supplement: supplementary_material [file reference.pdf › CamC2V_Supplementary/sample03/reference.pdf]

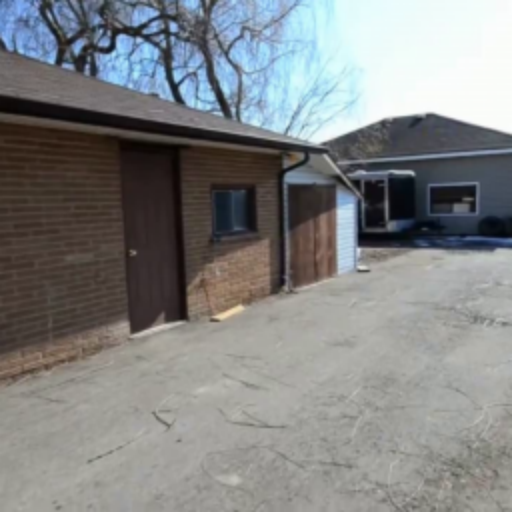

Supplement: supplementary_material [file context01.pdf › CamC2V_Supplementary/sample04/context01.pdf]

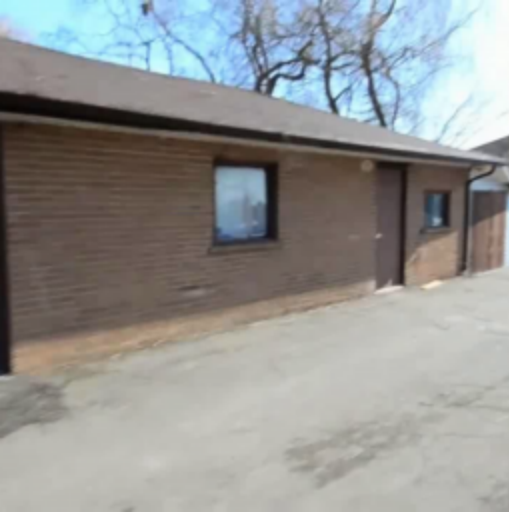

Supplement: supplementary_material [file reference.pdf › CamC2V_Supplementary/sample04/reference.pdf]

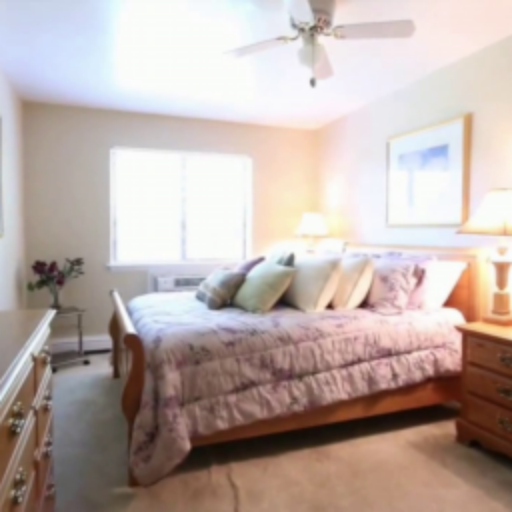

Supplement: supplementary_material [file context01.pdf › CamC2V_Supplementary/sample05/context01.pdf]

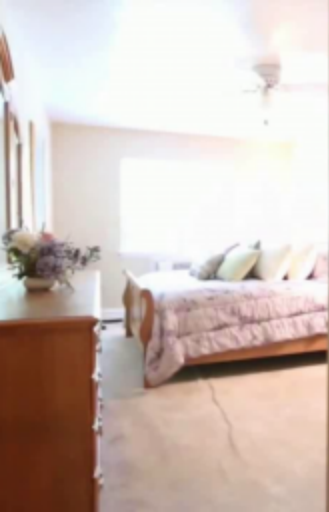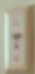

Supplement: supplementary_material [file reference.pdf › CamC2V_Supplementary/sample05/reference.pdf]
